# Supplementary material for: Insights into secondary organic aerosol formation from the day- and nighttime oxidation of PAHs and furans in an oxidation flow reactor
Source: Copernicus journal article supplement (doi:10.5194/egusphere-2023-1355), 2023-07-04
Supplement: Supplementary file 1 [file egusphere-2023-1355-supplement.pdf]

## Supplementary material

### Insights into secondary organic aerosol formation from the day- and nighttime oxidation of PAHs and furans in an oxidation flow reactor

5 Abd El Rahman El Mais<sup>1,2</sup>, Barbara D'Anna<sup>2</sup>, Luka Drinovec<sup>3</sup>, Andrew T. Lambe<sup>4</sup>, Zhe Peng<sup>5</sup>, Jean-Eudes Petit<sup>6</sup>, Olivier Favez<sup>1</sup>, Selim Aït-Aïssa<sup>1</sup>, Alexandre Albinet<sup>1</sup>

<sup>1</sup>Ineris, Parc Technologique Alata, Verneuil-en-Halatte, 60550, France

<sup>2</sup>Aix Marseille Univ, CNRS, LCE, Marseille, France

<sup>3</sup>Center for Atmospheric Research, University of Nova Gorica, Nova Gorica, Slovenia

<sup>4</sup>Aerodyne Research, Inc. (ARI), Billerica, Massachusetts, USA

10 <sup>5</sup>CIRES and Department of Chemistry, University of Colorado, Boulder, Colorado 80309, USA

<sup>6</sup>Laboratoire des Sciences du Climat et de l'Environnement (LSCE), 91190 Gif sur Yvette, France

*Correspondence to:* Alexandre Albinet (alexandre.albinet@ineris.fr)

## Table of Contents

|    |                                                                                                                                                                                                                                                                                                                                                                                                                                  |    |
|----|----------------------------------------------------------------------------------------------------------------------------------------------------------------------------------------------------------------------------------------------------------------------------------------------------------------------------------------------------------------------------------------------------------------------------------|----|
| 15 | TABLES .....                                                                                                                                                                                                                                                                                                                                                                                                                     | 3  |
|    | Table S1. Radical exposures in the PAM-OFR during both day and nighttime oxidation processes. ....                                                                                                                                                                                                                                                                                                                               | 3  |
|    | Table S2. Photon fluxes at 185 nm ( $I_{185}$ ) and 254 nm ( $I_{254}$ ) used as inputs to the OFR KinSim model in the case of OH radical. They were obtained by varying the model input flux values while keeping an $I_{185}$ to $I_{254}$ ratio of 0.0664 (Rowe et al., 2020) until the model output $O_3$ concentrations matched with $[O_3]_{PAM}$ . ....                                                                   | 3  |
| 20 | Table S3. Bimolecular rate coefficients of the studied SOA precursors with OH, $NO_3$ , and $O_3$ and their UV photo-absorption cross sections at/near 185 and 254 nm. ....                                                                                                                                                                                                                                                      | 4  |
|    | Table S4. Fixed filter loading compensation parameters $k(\lambda)$ used to manually compensate the AE33 data for each SOA precursor with the studied oxidant given the large jumps observed during the spot changes. ....                                                                                                                                                                                                       | 5  |
|    | Table S5. Air mass absorption efficiency values used for AE33 data (Drinovec et al., 2015). ....                                                                                                                                                                                                                                                                                                                                 | 6  |
| 25 | Table S6. Slope, intercept, and regression of the linear fit of $\ln(b_{abs})$ as a function of $\ln(\lambda)$ over the wavelength range 370 - 590 nm used to evaluate the absorption Ångström exponent ( $\alpha$ ). ....                                                                                                                                                                                                       | 6  |
|    | Table S7. Comparison of Absorption Ångström exponent ( $\alpha$ ) and Mass Absorption cross section (MAC) obtained for naphthalene SOA with literature data. ....                                                                                                                                                                                                                                                                | 7  |
|    | FIGURES .....                                                                                                                                                                                                                                                                                                                                                                                                                    | 8  |
| 30 | Figure S1. Examples of Q-ACSM measurements showing the stable PAHs and furans SOA generation through day- and nighttime oxidation processes during experiments lasting up to 5 hours. ....                                                                                                                                                                                                                                       | 8  |
|    | Figure S2. Modeled time series of OH, $NO_3$ , and VOC as a function of the total residence time ( $\tau$ ) (KinSim model results). No results are shown for Furan and Flu with $NO_3$ radicals due to unstable SOA generation or no SOA formed. ....                                                                                                                                                                            | 9  |
|    | Figure S3. Example of AE33 automatic compensation and manual compensation on the time evolution of BC concentrations measured at different wavelengths for Naph SOA produced with OH radical. ....                                                                                                                                                                                                                               | 10 |
| 35 | Figure S4. Comparison of wavelength-dependent absorption optical properties ( $b_{abs}$ , and MAC) of PAHs and furans SOA generated from the day- and nighttime oxidation processes (with OH and $NO_3$ radicals respectively). Results were plotted as a function of $\lambda$ in the range of 370 to 590 nm. No results are shown for Furan and Flu with $NO_3$ radicals due to unstable SOA generation or no SOA formed. .... | 11 |
| 40 | Figure S5. Variation of Absorption Ångström exponent ( $\alpha$ ) of the PAHs SOA generated from the day- and nighttime oxidation processes (with OH and $NO_3$ radicals respectively). No results are shown for Flu with $NO_3$ radicals because no SOA were formed. ....                                                                                                                                                       | 12 |
|    | REFERENCES .....                                                                                                                                                                                                                                                                                                                                                                                                                 | 13 |

## 45 TABLES

Table S1. Radical exposures in the PAM-OFR during both day and nighttime oxidation processes.

| SOA precursor  | OH exp (molecules cm <sup>-3</sup> s) |                         | NO <sub>3</sub> exp (molecules cm <sup>-3</sup> s) |
|----------------|---------------------------------------|-------------------------|----------------------------------------------------|
|                | Experimental evaluation               | KinSim calculations     |                                                    |
| <b>2-MF</b>    | 8.09 x 10 <sup>11</sup>               | 1.13 x 10 <sup>12</sup> | 1.68 x 10 <sup>12</sup>                            |
| <b>2,5-DMF</b> | 4.05 x 10 <sup>11</sup>               | 7.61 x 10 <sup>11</sup> | 5.15 x 10 <sup>12</sup>                            |
| <b>Furan</b>   | nd <sup>1</sup>                       | 1.05 x 10 <sup>10</sup> | *                                                  |
| <b>Naph</b>    | 3.74 x 10 <sup>11</sup>               | 2.78 x 10 <sup>11</sup> | 2.10 x 10 <sup>14</sup>                            |
| <b>Acy</b>     | 1.05 x 10 <sup>12</sup>               | 1.51 x 10 <sup>12</sup> | 6.44 x 10 <sup>13</sup>                            |
| <b>Flu</b>     | 2.19 x 10 <sup>12</sup>               | 2.57 x 10 <sup>12</sup> | **                                                 |
| <b>Phe</b>     | 1.46 x 10 <sup>12</sup>               | 1.96 x 10 <sup>12</sup> | 2.08 x 10 <sup>14</sup>                            |

<sup>1</sup>not determined.

\*Unstable furan injection inducing an unstable SOA generation.

\*\*No SOA formed.

- 50 Table S2. Photon fluxes at 185 nm ( $I_{185}$ ) and 254 nm ( $I_{254}$ ) used as inputs to the OFR KinSim model in the case of OH radical. They were obtained by varying the model input flux values while keeping an  $I_{185}$  to  $I_{254}$  ratio of 0.0664 (Rowe et al., 2020) until the model output O<sub>3</sub> concentrations matched with [O<sub>3</sub>]<sub>PAM</sub>.

| SOA precursor  | [O <sub>3</sub> ] <sub>PAM</sub> (ppm) | $I_{185}$ (photons cm <sup>-2</sup> s <sup>-1</sup> ) | $I_{254}$ (photons cm <sup>-2</sup> s <sup>-1</sup> ) |
|----------------|----------------------------------------|-------------------------------------------------------|-------------------------------------------------------|
| <b>2-MF</b>    | 15                                     | 8.2 x 10 <sup>13</sup>                                | 1.23 x 10 <sup>15</sup>                               |
| <b>2,5-DMF</b> | 12                                     | 7.18 x 10 <sup>13</sup>                               | 1.08 x 10 <sup>15</sup>                               |
| <b>Furan</b>   | 7                                      | 3.38 x 10 <sup>13</sup>                               | 5.09 x 10 <sup>14</sup>                               |
| <b>Naph</b>    | 3                                      | 1.41 x 10 <sup>13</sup>                               | 2.12 x 10 <sup>14</sup>                               |
| <b>Acy</b>     | 4                                      | 2.03 x 10 <sup>13</sup>                               | 3.06 x 10 <sup>14</sup>                               |
| <b>Flu</b>     | 11                                     | 5.88 x 10 <sup>13</sup>                               | 8.86 x 10 <sup>14</sup>                               |
| <b>Phe</b>     | 10                                     | 4.85 x 10 <sup>13</sup>                               | 7.30 x 10 <sup>14</sup>                               |

**Table S3. Bimolecular rate coefficients of the studied SOA precursors with OH, NO<sub>3</sub>, and O<sub>3</sub> and their UV photo-absorption cross sections at/near 185 and 254 nm.**

| SOA precursor  | Bimolecular rate coefficients (cm <sup>3</sup> molecule <sup>-1</sup> s <sup>-1</sup> ) |                                       |                                         | Photo-absorption cross sections (σ <sub>i</sub> ) (cm <sup>2</sup> molecule <sup>-1</sup> ) |                                        |
|----------------|-----------------------------------------------------------------------------------------|---------------------------------------|-----------------------------------------|---------------------------------------------------------------------------------------------|----------------------------------------|
|                | k <sub>OH</sub>                                                                         | k <sub>NO<sub>3</sub></sub>           | k <sub>O<sub>3</sub></sub>              | λ = 185 nm                                                                                  | λ = 254 nm                             |
| <b>2-MF</b>    | 7.00 x 10 <sup>-11</sup> <sup>a</sup>                                                   | 2.57 x 10 <sup>-11</sup> <sup>b</sup> | 8.50 x 10 <sup>-17</sup> <sup>c</sup>   | 8.36 x 10 <sup>-18</sup> <sup>Δj</sup>                                                      | 3.79 x 10 <sup>-19</sup> <sup>Δj</sup> |
| <b>2,5-DMF</b> | 1.16 x 10 <sup>-10</sup> <sup>a</sup>                                                   | 5.78 x 10 <sup>-11</sup> <sup>b</sup> | 4.20 x 10 <sup>-16</sup> <sup>d</sup>   | 8.36 x 10 <sup>-18</sup> <sup>*</sup>                                                       | 3.79 x 10 <sup>-19</sup> <sup>*</sup>  |
| <b>Furan</b>   | 3.83 x 10 <sup>-11</sup> <sup>a</sup>                                                   | 1.30 x 10 <sup>-12</sup> <sup>d</sup> | 2.42 x 10 <sup>-18</sup> <sup>d</sup>   | 1.18 x 10 <sup>-17</sup> <sup>Δk</sup>                                                      | 2.59 x 10 <sup>-19</sup> <sup>Δk</sup> |
| <b>Naph</b>    | 2.30 x 10 <sup>-11</sup> <sup>a</sup>                                                   | 4.60 x 10 <sup>-17</sup> <sup>e</sup> | < 2.00 x 10 <sup>-19</sup> <sup>e</sup> | 2.67 x 10 <sup>-17</sup> <sup>Δl</sup>                                                      | 1.09 x 10 <sup>-17</sup> <sup>Δm</sup> |
| <b>Acy</b>     | 1.09 x 10 <sup>-10</sup> <sup>a</sup>                                                   | 5.45 x 10 <sup>-12</sup> <sup>f</sup> | 5.50 x 10 <sup>-16</sup> <sup>f</sup>   | 7.92 x 10 <sup>-17</sup> <sup>n</sup>                                                       | 2.74 x 10 <sup>-17</sup> <sup>n</sup>  |
| <b>Flu</b>     | 1.31 x 10 <sup>-11</sup> <sup>a</sup>                                                   | 1.52 x 10 <sup>-14</sup> <sup>g</sup> | < 2.00 x 10 <sup>-19</sup> <sup>h</sup> | 7.89 x 10 <sup>-17</sup> <sup>n</sup>                                                       | 2.57 x 10 <sup>-17</sup> <sup>n</sup>  |
| <b>Phe</b>     | 2.40 x 10 <sup>-11</sup> <sup>a</sup>                                                   | 1.20 x 10 <sup>-13</sup> <sup>i</sup> | 4.00 x 10 <sup>-19</sup> <sup>i</sup>   | 2.44 x 10 <sup>-17</sup> <sup>Δl</sup>                                                      | 3.06 x 10 <sup>-17</sup> <sup>Δl</sup> |

55 <sup>a</sup>(Database for the Kinetics of the Gas-Phase Atmospheric Reactions of Organic Compounds). <sup>b</sup>(Kind et al., 1996). <sup>c</sup>(Li et al., 2018). <sup>d</sup>(Jiang et al., 2020). <sup>e</sup>(Keyte et al., 2013). <sup>f</sup>(Atkinson and Aschmann, 1988). <sup>g</sup>(Ding et al., 2020). <sup>h</sup>(Kwok et al., 1997). <sup>i</sup>(Kwok et al., 1994).

<sup>Δ</sup>(The MPI-Mainz UV/VIS Spectral Atlas of Gaseous Molecules of Atmospheric Interest). <sup>j</sup>(Giuliani et al., 2003). <sup>k</sup>(Christianson et al., 2021). <sup>l</sup>(Kitagawa, 1968). <sup>m</sup>(Grosch et al., 2015). <sup>n</sup>(Theoretical spectral database of PAHs).

60 <sup>\*</sup>No information available in the literature. Assumed equal to the ones of 2-MF.

**Table S4. Fixed filter loading compensation parameters  $k(\lambda)$  used to manually compensate the AE33 data for each SOA precursor with the studied oxidant given the large jumps observed during the spot changes.**

|               |                 | Wavelength (nm) |         |         |         |
|---------------|-----------------|-----------------|---------|---------|---------|
|               |                 | 370             | 470     | 520     | 590     |
| SOA Precursor | Reactivity      | $k(\lambda)$    |         |         |         |
| <b>Naph</b>   | OH              | 0.00350         | 0.00570 | 0.02129 | 0.03687 |
|               | NO <sub>3</sub> | 0.00496         | 0.00665 | 0.02961 | 0.06053 |
| <b>Acy</b>    | OH              | 0.00444         | 0.00578 | 0.00034 | 0.01140 |
|               | NO <sub>3</sub> | 0.00376         | 0.00054 | 0.02944 | 0.07180 |
| <b>Flu</b>    | OH              | 0.00234         | 0.00610 | 0.03821 | 0.08846 |
|               | NO <sub>3</sub> | *               | *       | *       | *       |
| <b>Phe</b>    | OH              | 0.00492         | 0.01600 | 0.05480 | 0.12789 |
|               | NO <sub>3</sub> | **              | **      | **      | **      |

\* No data are shown for Flu with NO<sub>3</sub> radicals because no SOA were formed.

\*\*No jumps observed during the spot changes so no manual compensation was done. The same was obtained with furan SOA under both OH and NO<sub>3</sub> reactivities.

**Table S5. Air mass absorption efficiency values used for AE33 data (Drinovec et al., 2015).**

| Channel                                              | 1     | 2     | 3     | 4     | 5     | 6    | 7    |
|------------------------------------------------------|-------|-------|-------|-------|-------|------|------|
| Wavelength (nm)                                      | 370   | 470   | 520   | 590   | 660   | 880  | 950  |
| $\sigma_{\text{air}}$ ( $\text{m}^2 \text{g}^{-1}$ ) | 18.47 | 14.54 | 13.14 | 11.58 | 10.35 | 7.77 | 7.19 |

**Table S6. Slope, intercept, and regression of the linear fit of  $\ln(b_{\text{abs}})$  as a function of  $\ln(\lambda)$  over the wavelength range 370 - 590 nm used to evaluate the absorption Ångström exponent ( $\alpha$ ).**

|                               | Slope   | Intercept | R <sup>2</sup> |
|-------------------------------|---------|-----------|----------------|
| <b>OH radical</b>             |         |           |                |
| Naph                          | -5.4329 | -87.9898  | 0.9570         |
| Acy                           | -8.3516 | -132.1933 | 0.9939         |
| Flu                           | -6.0803 | -99.4019  | 0.9803         |
| Phe                           | -6.9225 | -112.1611 | 0.9951         |
| <b>NO<sub>3</sub> radical</b> |         |           |                |
| Naph                          | -5.5670 | -89.6167  | 0.9665         |
| Acy                           | -6.7757 | -107.7455 | 0.9698         |
| Flu                           | -       | -         | -              |
| Phe                           | -7.0470 | -115.1764 | 0.9910         |

**Table S7. Comparison of Absorption Ångström exponent ( $\alpha$ ) and Mass Absorption cross section (MAC) obtained for naphthalene SOA with literature data.**

| Experimental conditions                                  | Methodology                                                                                | $\lambda$ range (nm) | $\alpha$        | MAC, 400-405 nm ( $\text{m}^2 \text{g}^{-1}$ ) | References             |
|----------------------------------------------------------|--------------------------------------------------------------------------------------------|----------------------|-----------------|------------------------------------------------|------------------------|
| OH, OFR, without $\text{NO}_x$ , RH = 41%                | 7 $\lambda$ AE33                                                                           | 370 - 590            | $5.43 \pm 0.15$ | 0.22                                           | This study             |
| $\text{NO}_3$ , OFR, without $\text{NO}_x$ , RH = 43%    |                                                                                            |                      | $5.57 \pm 0.12$ | 0.22                                           |                        |
| OH, smog chamber, low $\text{NO}_x$ , RH = 0 - 89 %      | UV-Vis measurements of SOA filter extracts                                                 | 280 - 680            | 5.5 - 7.6       | 0.15-0.26                                      | (Klodt et al., 2023)   |
| OH, smog chamber, high $\text{NO}_x$ , RH = 0 - 94 %     |                                                                                            |                      |                 | 0.2-0.35                                       |                        |
| OH, OFR, $\text{NO}_x$ , RH = 39%                        | HPLC equipped with a photodiode array detector and electrospray ionization HR-MS           | 315 - 650            | -               | 0.22-0.38                                      | (He et al., 2022)      |
| OH, OFR, low $\text{NO}_x$ , RH = 38%                    | HPLC equipped with a photodiode array detector and electrospray ionization HR-MS           | 300 - 450            | 8.87            | 0.12                                           | (Siemens et al., 2022) |
| OH, OFR, high $\text{NO}_x$ , RH = 38%                   |                                                                                            |                      | 7.59            | 0.19                                           |                        |
| OH, smog chamber, $\text{H}_2\text{O}_2$ , RH = 12 - 15% | UV-Vis measurements of SOA filter extracts                                                 | 300 - 550            | $6.46 \pm 0.25$ | 0.35                                           | (Xie et al., 2017)     |
| OH, smog chamber, high $\text{NO}_x$ , RH = 10 - 19%     |                                                                                            |                      | $4.92 \pm 0.23$ | 0.78                                           |                        |
| OH, smog chamber, high $\text{NO}_x$ , dry               | UV-Vis measurements of SOA filter extracts                                                 | 400 - 630            | 6.2             | 0.12                                           | (Lee et al., 2014)     |
| OH, OFR, without $\text{NO}_x$ , RH = 30 - 40%           | UV-Vis measurements of SOA filter extracts and cavity ring-down photoacoustic spectrometry | 300 - 500            | 5.2 - 6.6       | 0.02 - 0.09                                    | (Lambe et al., 2013)   |
| OH, smog chamber, high $\text{NO}_x$ , seed, RH < 5%     | 3 $\lambda$ photoacoustic soot spectrometer (PASS-3)                                       | 405 - 781            | >3.53           | $0.81 \pm 0.32$                                | (Metcalf et al., 2013) |
| OH, smog chamber, without $\text{NO}_x$ , RH < 2%        | UV-Vis measurements of SOA filter extracts                                                 | 400 - 630            | 6.2             | 0.07                                           | (Updyke et al., 2012)  |
| OH, smog chamber, with $\text{NO}_x$ , RH < 2%           |                                                                                            |                      | 6.7             | 0.22                                           |                        |

## FIGURES

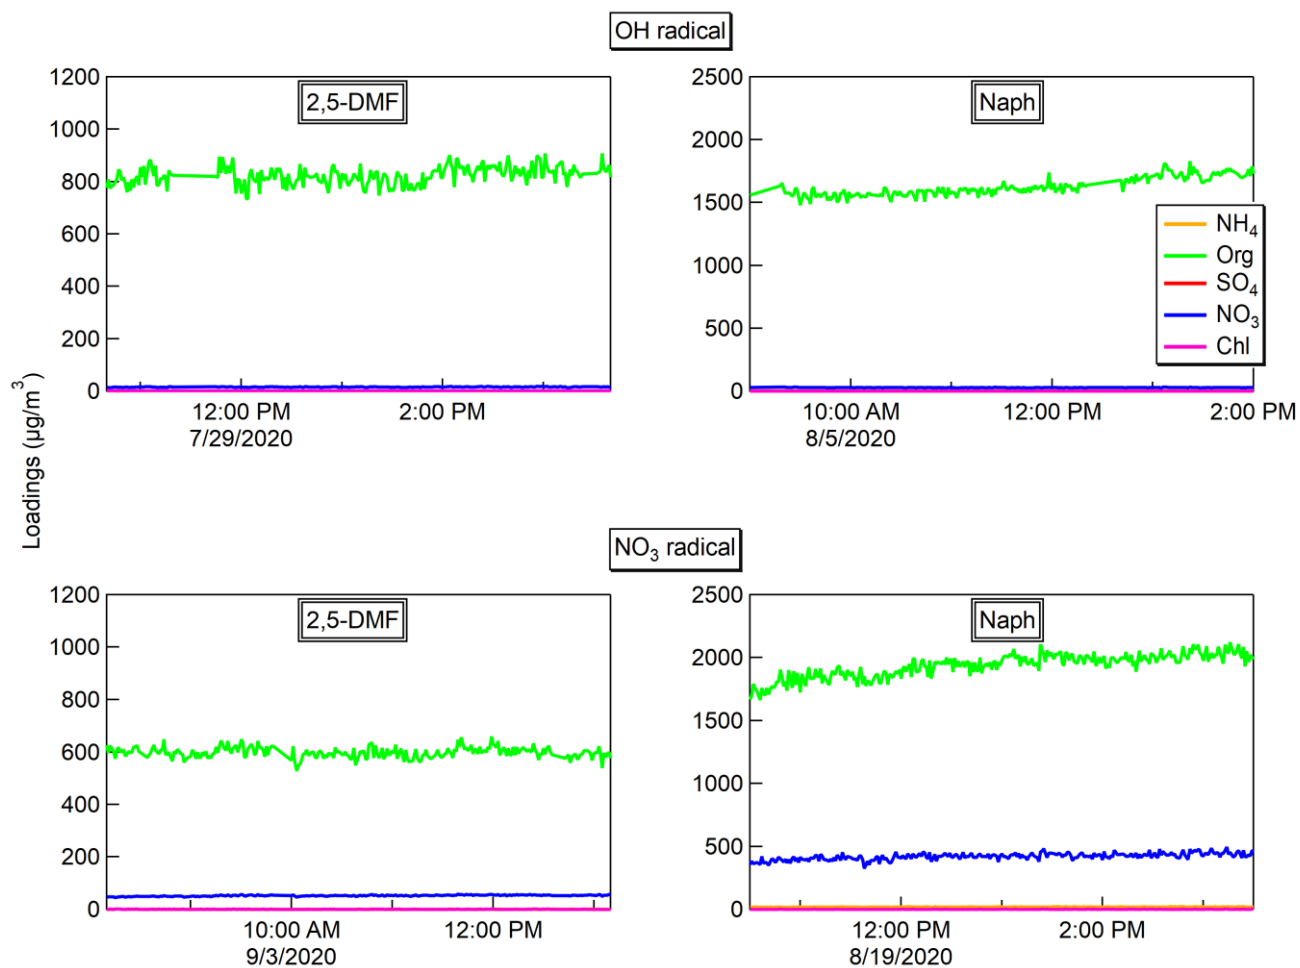

**Figure S1. Examples of Q-ACSM measurements showing the stable PAHs and furans SOA generation through day- and nighttime oxidation processes during experiments lasting up to 5 hours.**



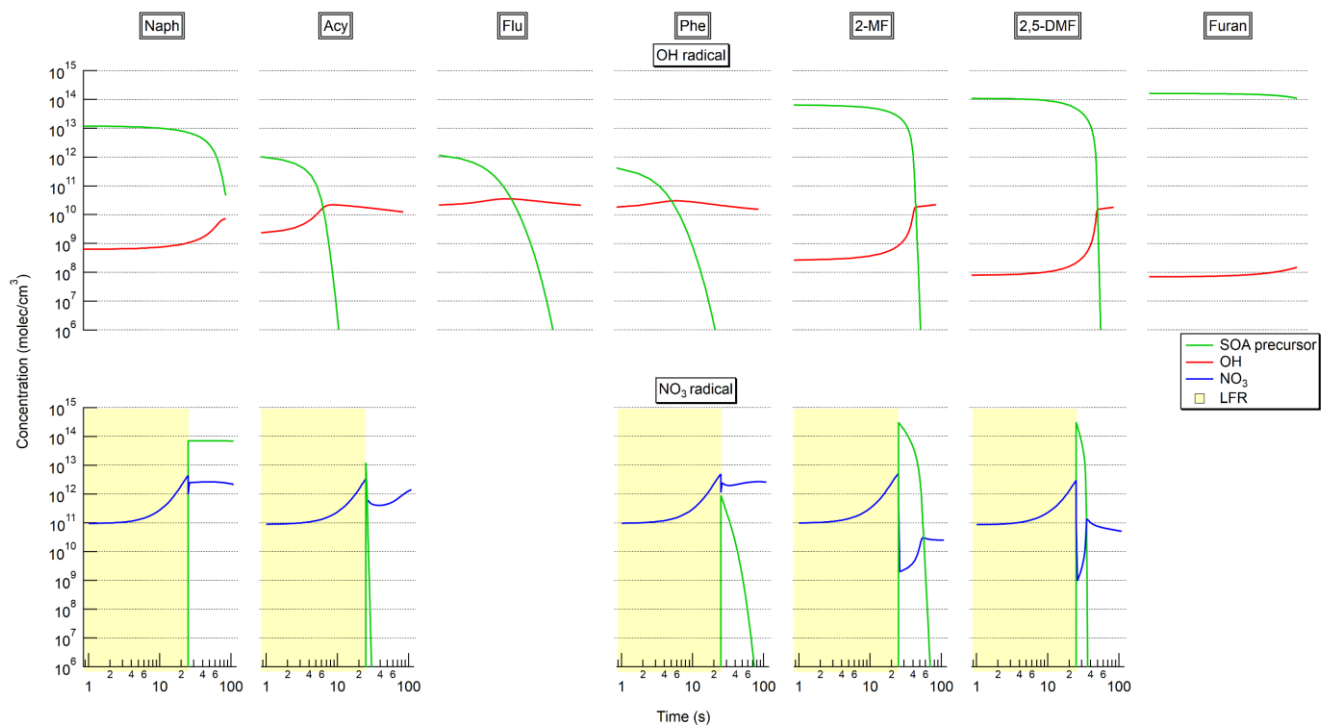

**Figure S2. Modeled time series of OH, NO<sub>3</sub>, and VOC as a function of the total residence time ( $\tau$ ) (KinSim model results). No results are shown for Furan and Flu with NO<sub>3</sub> radicals due to unstable SOA generation or no SOA formed.**

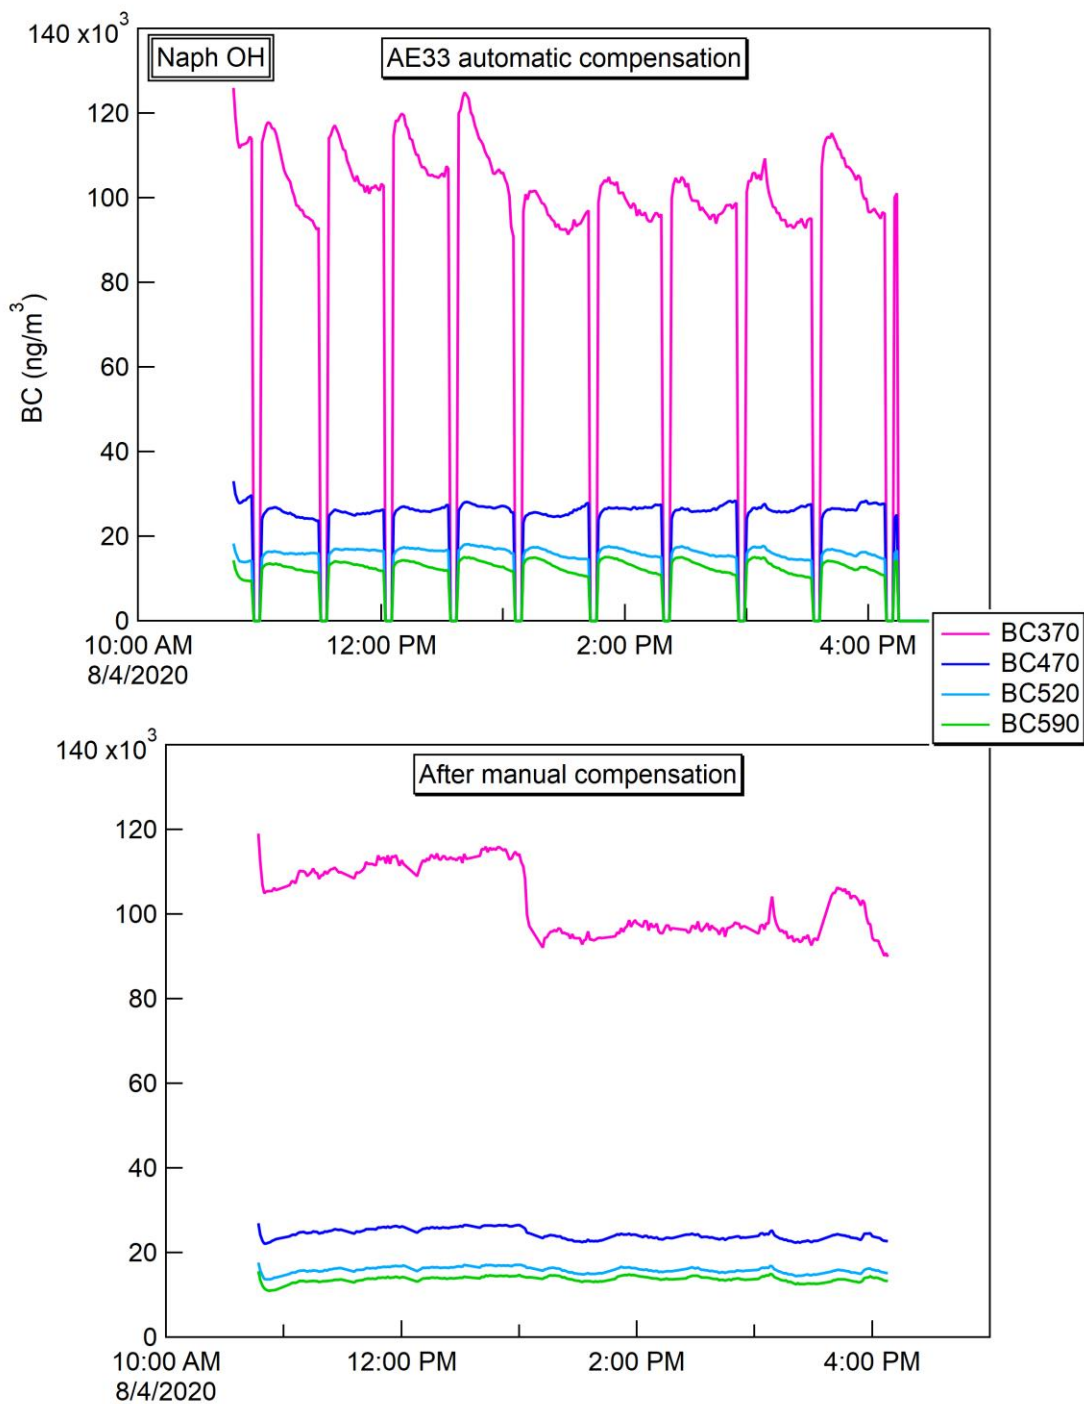

85

**Figure S3. Example of AE33 automatic compensation and manual compensation on the time evolution of BC concentrations measured at different wavelengths for Naph SOA produced with OH radical.**

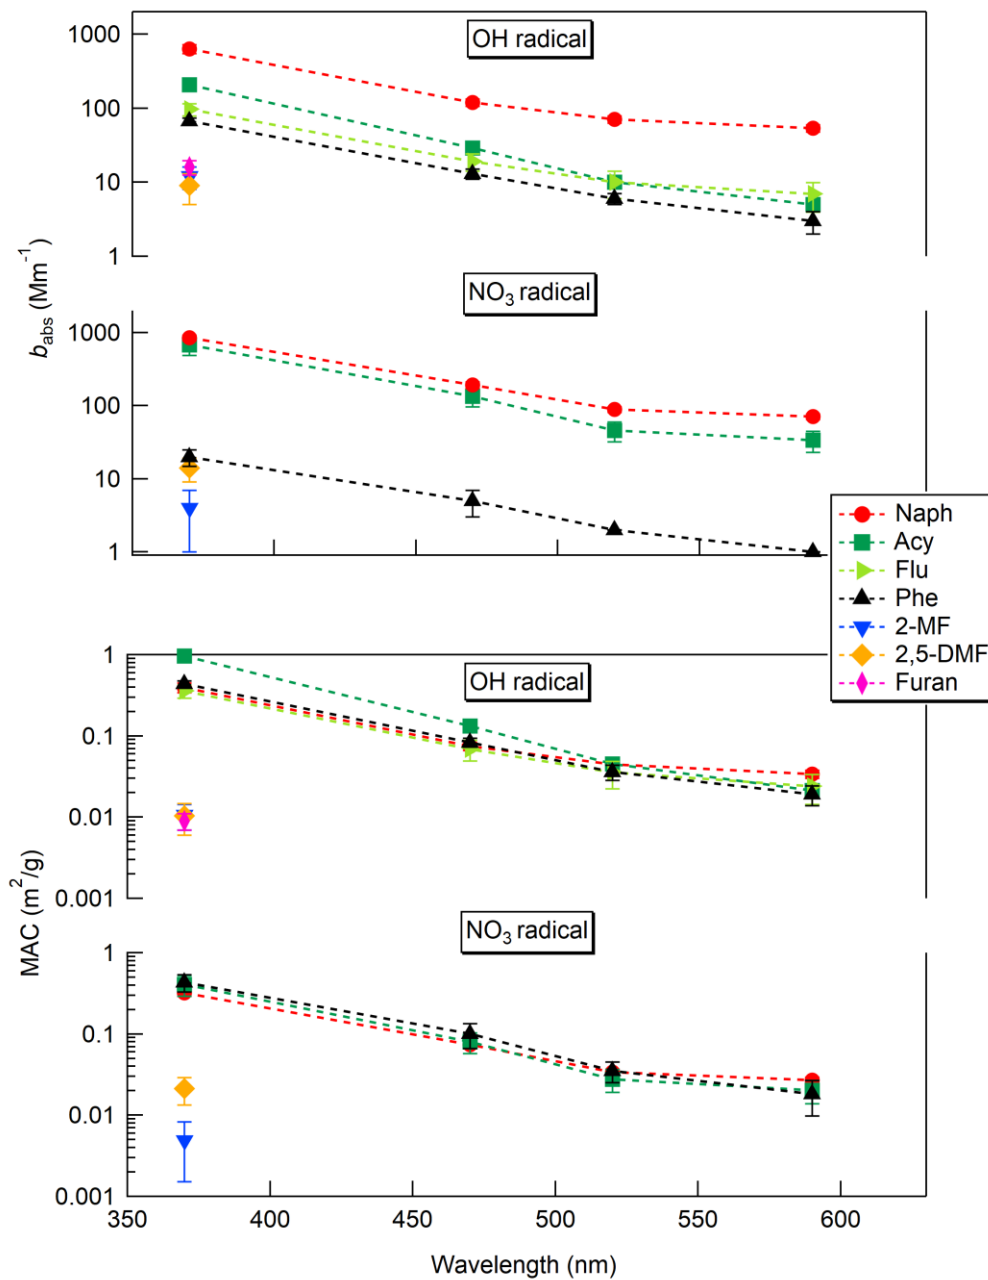

90 **Figure S4.** Comparison of wavelength-dependent absorption optical properties ( $b_{abs}$ , and MAC) of PAHs and furans SOA generated from the day- and nighttime oxidation processes (with OH and  $NO_3$  radicals respectively). Results were plotted as a function of  $\lambda$  in the range of 370 to 590 nm. No results are shown for Furan and Flu with  $NO_3$  radicals due to unstable SOA generation or no SOA formed.

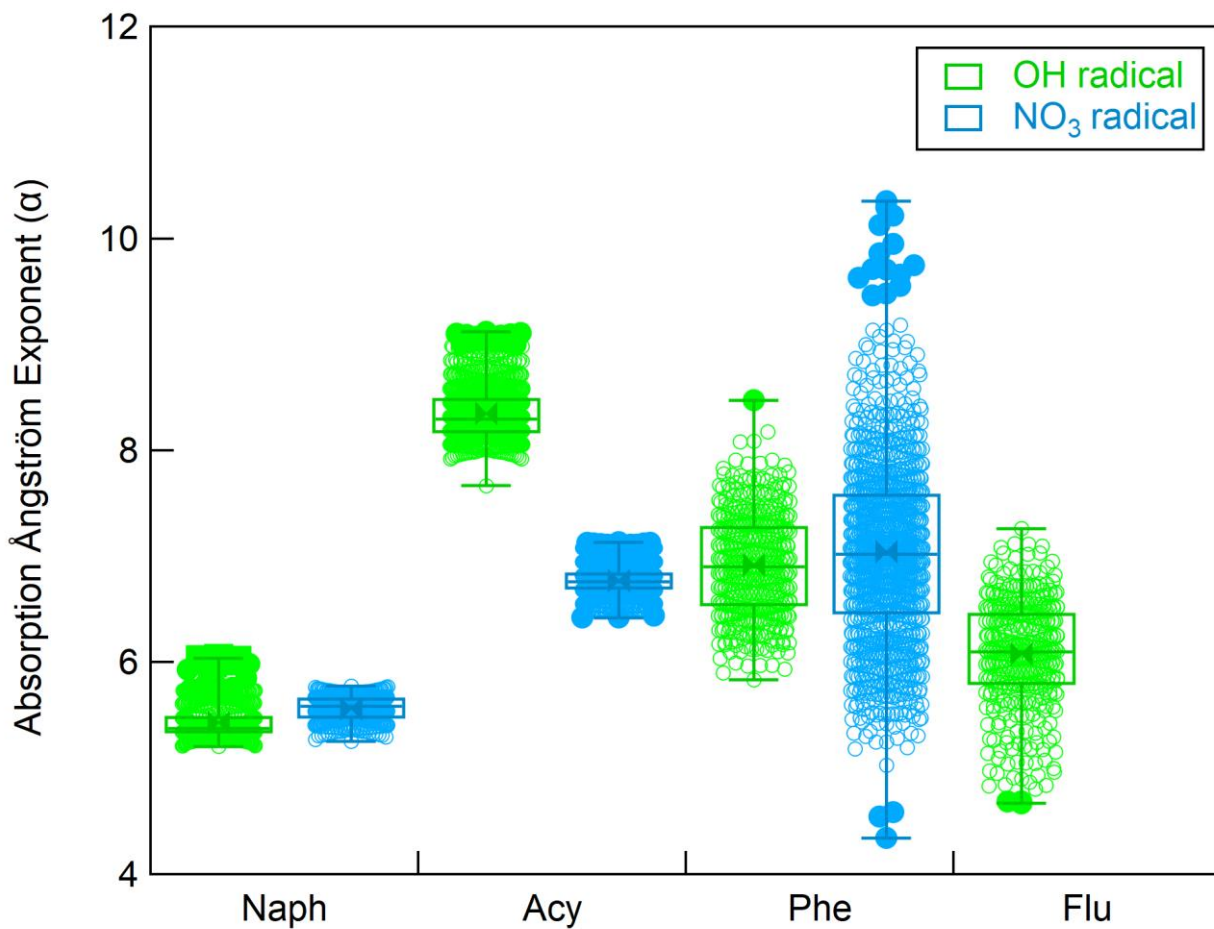

95 Figure S5. Variation of Absorption Ångström exponent ( $\alpha$ ) of the PAHs SOA generated from the day- and nighttime oxidation processes (with OH and  $\text{NO}_3$  radicals respectively). No results are shown for Flu with  $\text{NO}_3$  radicals because no SOA were formed.

## REFERENCES

- 100 The MPI-Mainz UV/VIS Spectral Atlas of Gaseous Molecules of Atmospheric Interest: <https://essd.copernicus.org/articles/5/365/2013/>.
- Database for the Kinetics of the Gas-Phase Atmospheric Reactions of Organic Compounds: <https://data.eurochamp.org/data-access/kin/#/data>.
- Theoretical spectral database of PAHs: <https://www.dsf.unica.it/~gmallocci/pahs/index.html>.
- 105 Atkinson, R. and Aschmann, S. M.: Kinetics of the reactions of acenaphthene and acenaphthylene and structurally-related aromatic compounds with OH and NO<sub>3</sub> radicals, N<sub>2</sub>O<sub>5</sub> and O<sub>3</sub> at 296 ± 2 K: KINETICS OF GAS-PHASE REACTIONS, *Int. J. Chem. Kinet.*, 20, 513–539, <https://doi.org/10.1002/kin.550200703>, 1988.
- Christianson, M. G., Doner, A. C., Koritzke, A. L., Frandsen, K., and Rotavera, B.: Vacuum-ultraviolet absorption cross-sections of functionalized cyclic hydrocarbons: Five-membered rings, *Journal of Quantitative Spectroscopy and Radiative Transfer*, 258, 107274, <https://doi.org/10.1016/j.jqsrt.2020.107274>, 2021.
- 110 Ding, Z., Yi, Y., Wang, W., and Zhang, Q.: Understanding the role of Cl and NO<sub>3</sub> radicals in initiating atmospheric oxidation of fluorene: A mechanistic and kinetic study, *Science of The Total Environment*, 716, 136905, <https://doi.org/10.1016/j.scitotenv.2020.136905>, 2020.
- Drinovec, L., Močnik, G., Zotter, P., Prévôt, A. S. H., Ruckstuhl, C., Coz, E., Rupakheti, M., Sciare, J., Müller, T., Wiedensohler, A., and Hansen, A. D. A.: The “dual-spot” Aethalometer: an improved measurement of aerosol black carbon with real-time loading compensation, *Atmospheric Measurement Techniques*, 8, 1965–1979, <https://doi.org/10.5194/amt-8-1965-2015>, 2015.
- Giuliani, A., Delwiche, J., Hoffmann, S. V., Limão-Vieira, P., Mason, N. J., and Hubin-Franskin, M.-J.: 2-methyl furan: An experimental study of the excited electronic levels by electron energy loss spectroscopy, vacuum ultraviolet photoabsorption, and photoelectron spectroscopy, *J. Chem. Phys.*, 119, 3670–3680, <https://doi.org/10.1063/1.1590960>, 2003.
- 120 Grosch, H., Sárossy, Z., Egsgaard, H., and Fateev, A.: UV absorption cross-sections of phenol and naphthalene at temperatures up to 500°C, *Journal of Quantitative Spectroscopy and Radiative Transfer*, 156, 17–23, <https://doi.org/10.1016/j.jqsrt.2015.01.021>, 2015.
- 125 He, Q., Li, C., Siemens, K., Morales, A. C., Hettiyadura, A. P. S., Laskin, A., and Rudich, Y.: Optical Properties of Secondary Organic Aerosol Produced by Photooxidation of Naphthalene under NO<sub>x</sub> Condition, *Environ. Sci. Technol.*, 56, 4816–4827, <https://doi.org/10.1021/acs.est.1c07328>, 2022.
- Jiang, J., Carter, W. P. L., Cocker, D. R. I., and Barsanti, K. C.: Development and Evaluation of a Detailed Mechanism for Gas-Phase Atmospheric Reactions of Furans, *ACS Earth Space Chem.*, 4, 1254–1268, <https://doi.org/10.1021/acsearthspacechem.0c00058>, 2020.
- 130 Keyte, I. J., Harrison, R. M., and Lammel, G.: Chemical reactivity and long-range transport potential of polycyclic aromatic hydrocarbons – a review, *Chem. Soc. Rev.*, 42, 9333, <https://doi.org/10.1039/c3cs60147a>, 2013.
- Kind, I., Berndt, T., Böge, O., and Rolle, W.: Gas-phase rate constants for the reaction of NO<sub>3</sub> radicals with furan and methyl-substituted furans, *Chemical Physics Letters*, 256, 679–683, [https://doi.org/10.1016/0009-2614\(96\)00513-1](https://doi.org/10.1016/0009-2614(96)00513-1), 1996.

- Kitagawa, T.: Absorption spectra and photoionization of polycyclic aromatics in vacuum ultraviolet region, *Journal of Molecular Spectroscopy*, 26, 1–23, [https://doi.org/10.1016/0022-2852\(68\)90139-2](https://doi.org/10.1016/0022-2852(68)90139-2), 1968.
- 135 Klodt, A., Aiona, P., MacMillan, A., Lee, H. J. (Julie), Zhang, X., Helgestad, T., Novak, G., Lin, P., Laskin, J., Laskin, A., Bertram, T., Cappa, C., and Nizkorodov, S. A.: Effect of Relative Humidity, NO<sub>x</sub>, and Ammonia on Physical Properties of Naphthalene Secondary Organic Aerosol, *Environ. Sci.: Atmos.*, <https://doi.org/10.1039/D3EA00033H>, 2023.
- Kwok, E. S. C., Harger, W. P., Arey, Janet., and Atkinson, Roger.: Reactions of Gas-Phase Phenanthrene under Simulated Atmospheric Conditions, *Environ. Sci. Technol.*, 28, 521–527, <https://doi.org/10.1021/es00052a027>, 1994.
- 140 Kwok, E. S. C., Atkinson, R., and Arey, J.: Kinetics of the gas-phase reactions of indan, indene, fluorene, and 9,10-dihydroanthracene with OH radicals, NO<sub>3</sub> radicals, and O<sub>3</sub>, *International Journal of Chemical Kinetics*, 29, 299–309, [https://doi.org/10.1002/\(SICI\)1097-4601\(1997\)29:4<299::AID-KIN9>3.0.CO;2-P](https://doi.org/10.1002/(SICI)1097-4601(1997)29:4<299::AID-KIN9>3.0.CO;2-P), 1997.
- Lambe, A. T., Cappa, C. D., Massoli, P., Onasch, T. B., Forestieri, S. D., Martin, A. T., Cummings, M. J., Croasdale, D. R., Brune, W. H., Worsnop, D. R., and Davidovits, P.: Relationship between Oxidation Level and Optical Properties of Secondary Organic Aerosol, *Environ. Sci. Technol.*, 47, 6349–6357, <https://doi.org/10.1021/es401043j>, 2013.
- 145 Lee, H. J. (Julie), Aiona, P. K., Laskin, A., Laskin, J., and Nizkorodov, S. A.: Effect of Solar Radiation on the Optical Properties and Molecular Composition of Laboratory Proxies of Atmospheric Brown Carbon, *Environ. Sci. Technol.*, 48, 10217–10226, <https://doi.org/10.1021/es502515r>, 2014.
- Li, M., Liu, Y., and Wang, L.: Gas-phase ozonolysis of furans, methylfurans, and dimethylfurans in the atmosphere, *Phys. Chem. Chem. Phys.*, 20, 24735–24743, <https://doi.org/10.1039/C8CP04947E>, 2018.
- 150 Metcalf, A. R., Loza, C. L., Coggon, M. M., Craven, J. S., Jonsson, H. H., Flagan, R. C., and Seinfeld, J. H.: Secondary Organic Aerosol Coating Formation and Evaporation: Chamber Studies Using Black Carbon Seed Aerosol and the Single-Particle Soot Photometer, *Aerosol Science and Technology*, 47, 326–347, <https://doi.org/10.1080/02786826.2012.750712>, 2013.
- Rowe, J. P., Lambe, A. T., and Brune, W. H.: Technical Note: Effect of varying the  $\lambda = 185$  and 254 nm photon flux ratio on radical generation in oxidation flow reactors, *Atmospheric Chemistry and Physics*, 20, 13417–13424, <https://doi.org/10.5194/acp-20-13417-2020>, 2020.
- 155 Siemens, K., Morales, A., He, Q., Li, C., Hettiyadura, A. P. S., Rudich, Y., and Laskin, A.: Molecular Analysis of Secondary Brown Carbon Produced from the Photooxidation of Naphthalene, *Environ. Sci. Technol.*, 56, 3340–3353, <https://doi.org/10.1021/acs.est.1c03135>, 2022.
- 160 Updyke, K. M., Nguyen, T. B., and Nizkorodov, S. A.: Formation of brown carbon via reactions of ammonia with secondary organic aerosols from biogenic and anthropogenic precursors, *Atmospheric Environment*, 63, 22–31, <https://doi.org/10.1016/j.atmosenv.2012.09.012>, 2012.
- Xie, M., Chen, X., Hays, M. D., Lewandowski, M., Offenberg, J., Kleindienst, T. E., and Holder, A. L.: Light Absorption of Secondary Organic Aerosol: Composition and Contribution of Nitroaromatic Compounds, *Environ. Sci. Technol.*, 51, 11607–11616, <https://doi.org/10.1021/acs.est.7b03263>, 2017.
- 165
